# Supplementary material for: Micro–nano dual-scale embedded graphene/Ag architectures for flexible low-voltage-driven transparent electrothermal films
Source: Royal Society of Chemistry journal article supplement (doi:10.1039/d3tc00660c), 2023-01-01
Supplement: d3tc00660c1.pdf [file d3tc00660c1.pdf]

## Micro-nano dual-scale embedded graphene/Ag architectures for flexible low-voltage-driven transparent electrothermal films

Bangbang Nie,<sup>a,b</sup> Huiqian Song,<sup>a</sup> Benkun Lv,<sup>a</sup> Xinyi Xiong,<sup>a</sup> Guochen Qi,<sup>a</sup> Yudong Zhang,<sup>a</sup> Jingjiang Qiu,<sup>a</sup> Xiangming Li,<sup>c,\*</sup> Jinyou Shao,<sup>c</sup> Zonhan Wei,<sup>a,b,d,e,\*</sup>

<sup>a</sup>School of Mechanics and Safety Engineering, Zhengzhou University, Zhengzhou 450001, China

<sup>b</sup>Engineering Technology Research Center of Henan Province for MEMS Manufacturing and Application, Zhengzhou University, Zhengzhou 450001, China

<sup>c</sup>Micro- and Nano-Technology Research Center, State Key Laboratory for Manufacturing Systems Engineering, Xi'an Jiaotong University, Xi'an, Shaanxi 710049, China

<sup>d</sup>Institute of Intelligent Sensing, Zhengzhou University, Zhengzhou 450001, China

<sup>e</sup>School of Cyber Science and Engineering & Hanwei Institute of Internet of Things, Zhengzhou 450001, China

E-mail: xiangmingli@xjtu.edu.cn; prof.wei@outlook.com.

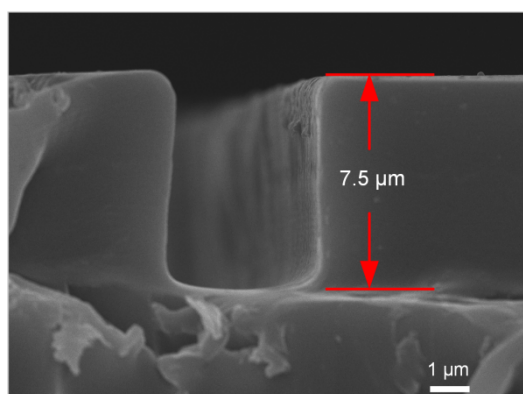

**Fig. S1.** The the cross section image of the microchannel.

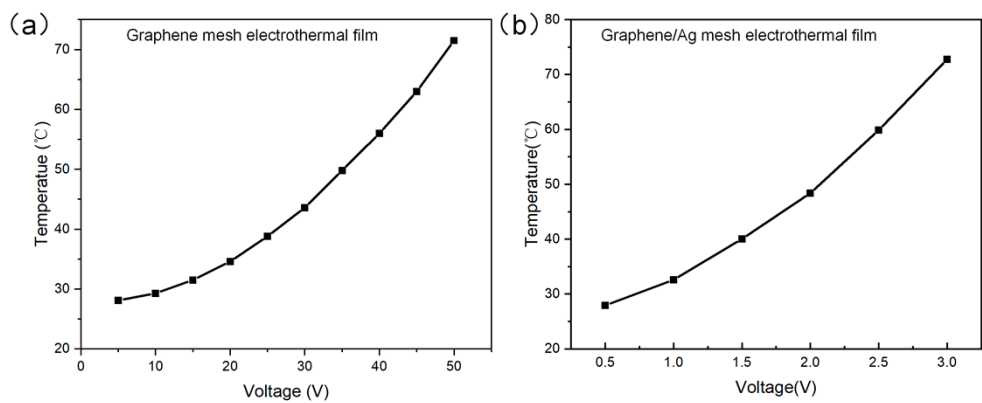

**Fig. S2.** The relationship curves between the surface temperature and the applied voltage.

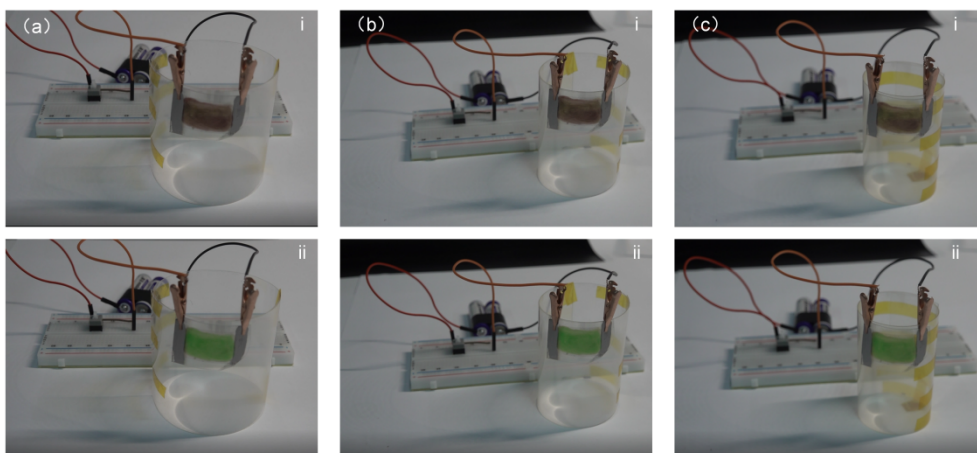

**Fig. S3.** The smart window attached to the structures with different curved surfaces.
